# Supplementary material for: Investigation of charge carrier dynamics in a Ti3C2Tx MXene for ultrafast photonics applications
Source: Royal Society of Chemistry journal article supplement (doi:10.1039/d3ma00429e), 2023-01-01
Supplement: d3ma00429e1.pdf [file d3ma00429e1.pdf]

## Supporting information

### Investigation of charge carrier dynamics in $Ti_3C_2T_x$ MXene for ultrafast photonics applications

Ankita Rawat<sup>1</sup>, Nitesh K. Chourasia<sup>1</sup>, Saurabh K. Saini<sup>2</sup>, Gaurav Rajput<sup>1</sup>, Aditya Yadav<sup>2</sup>,  
Ritesh Kumar Chourasia<sup>3</sup>, Govind Gupta<sup>2</sup>, P. K. Kulriya<sup>1\*</sup>

<sup>1</sup>School of Physical Sciences, Jawaharlal Nehru University, New Delhi 110067, India

<sup>2</sup>CSIR-National Physical Laboratory, New Delhi 110012, India

<sup>3</sup>Post-Graduate Department of Physics, Samastipur College (A Constituent College of L.N.M.U.- Darbhanga-846004, Bihar, India), Samastipur-848134, Bihar, India

\* Author to whom correspondence should be addressed. Present address: School of Physical Sciences, Jawaharlal Nehru University, New Delhi 110067, India, electronic mail: [pkkulriya@mail.jnu.ac.in](mailto:pkkulriya@mail.jnu.ac.in)

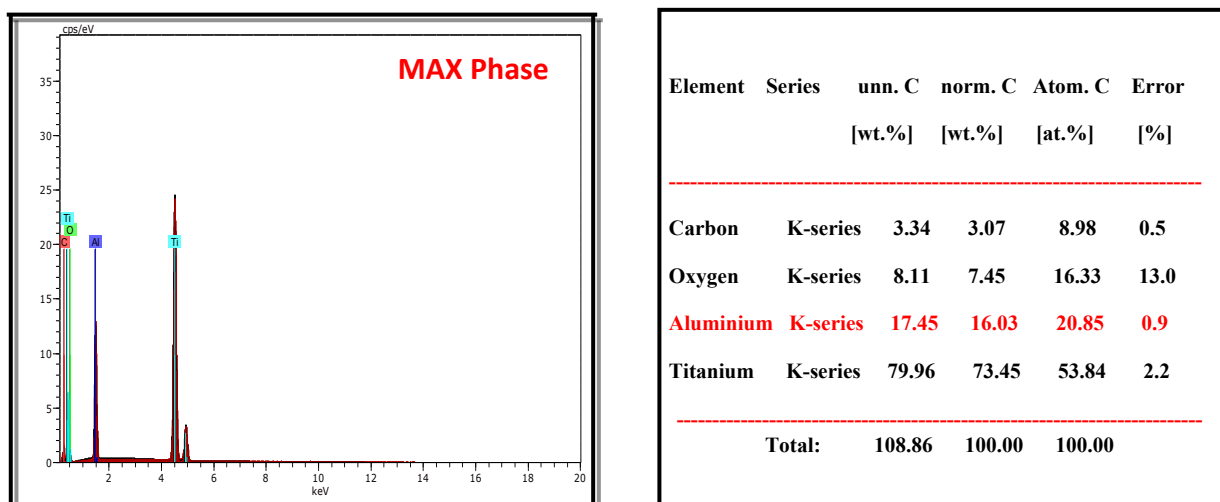

**Figure 1:** The elemental distributions for  $Ti_3AlC_2$  MAX phase.

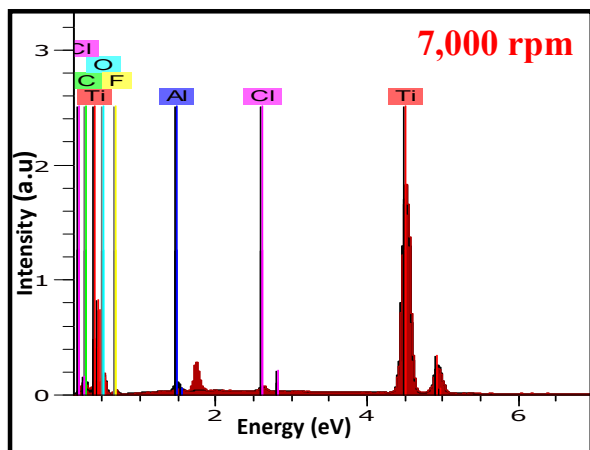

| Element   | Series   | unn. C<br>[wt.%] | norm. C<br>[wt.%] | Atom. C<br>[at.%] | Error<br>[%] |
|-----------|----------|------------------|-------------------|-------------------|--------------|
| Titanium  | K-series | 64.43            | 62.59             | 36.93             | 1.9          |
| Carbon    | K-series | 3.28             | 3.18              | 7.49              | 1.0          |
| Aluminium | K-series | 1.26             | 1.23              | 1.29              | 0.1          |
| Oxygen    | K-series | 20.71            | 20.12             | 35.53             | 34.1         |
| Chlorine  | K-series | 0.56             | 0.55              | 0.44              | 0.1          |
| Fluorine  | K-series | 12.69            | 12.33             | 18.33             | 4.2          |
| Total:    |          | 102.93           | 100.00            | 100.00            |              |

**Figure 2:** The elemental distributions for  $Ti_3C_2Tx$  MXenes at 7,000 rpm (S1)

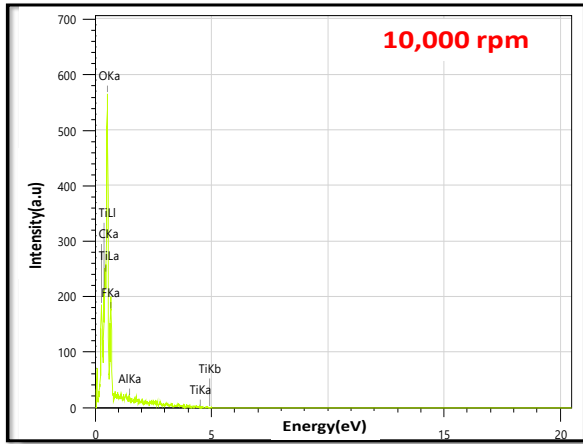

| Element | Line | Mass%                | Atom %     |
|---------|------|----------------------|------------|
| C       | K    | 3.77±0.06            | 8.93±0.15  |
| O       | K    | 21.85±0.39           | 38.88±0.69 |
| F       | K    | 8.74±0.28            | 13.09±0.42 |
| Al      | K    | 0.19±0.12            | 0.20±0.13  |
| Ti      | L    | 65.45±1.99           | 38.89±1.18 |
| Total   |      | 100.00               | 100.00     |
|         |      | Fitting ratio 0.1565 |            |

**Figure 3:** The elemental distributions for  $Ti_3C_2Tx$  MXenes at 10,000 rpm (S2)

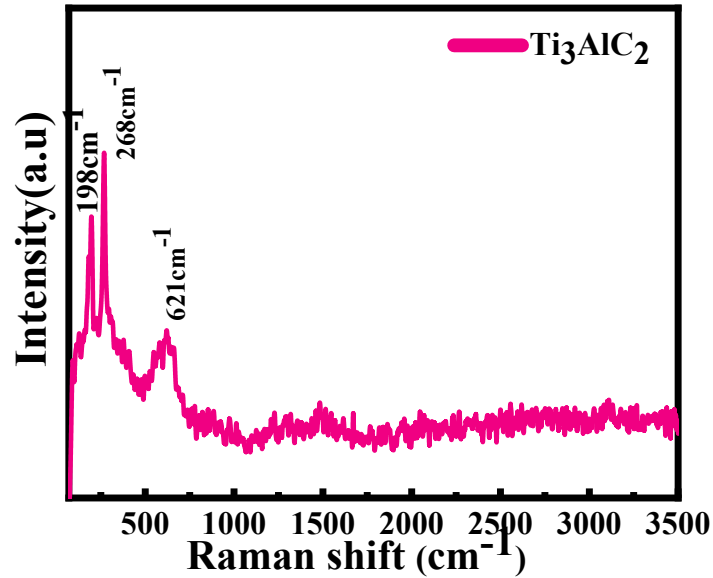

**Figure 4:** Raman spectra of  $Ti_3AlC_2$  MAX phase.

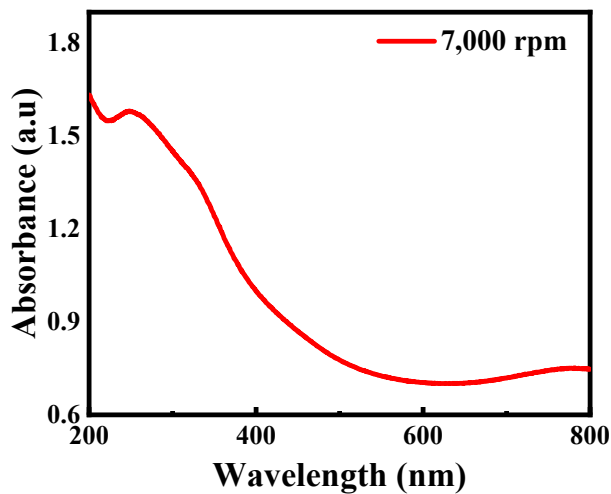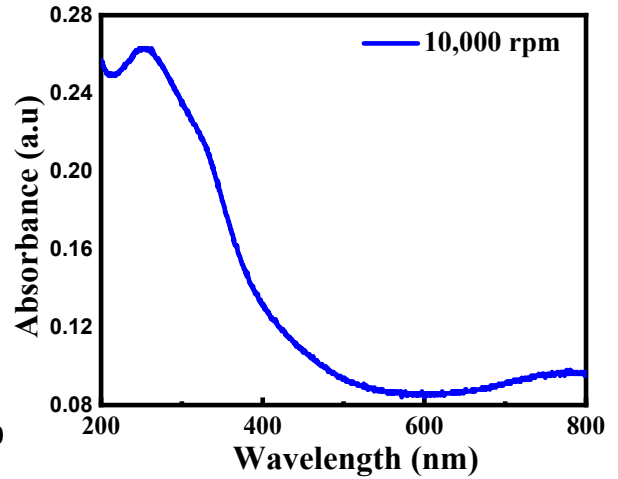

**Figure 5:** Absorption spectra of different rpm MXene supernatant S1 and S2.
